# Supplementary material for: Transfer and transformation of CeO2 NPs along a terrestrial trophic food chain
Source: Royal Society of Chemistry journal article supplement (doi:10.1039/c9en01143a), 2019-12-20
Supplement: c9en01143a1.pdf [file c9en01143a1.pdf]

*Supplementary information*

**Transfer and Transformation of CeO<sub>2</sub> NPs along a Terrestrial Trophic  
Food Chain**

Yanhui Dai,<sup>1,7</sup> Zhenyu Wang,<sup>1</sup> Lei Zhang,<sup>2</sup> Zhixiang Jiang,<sup>3,7</sup> Shengyan Pu,<sup>4</sup> Qiaohui Fan,<sup>5</sup> Jian Zhao,<sup>2,6,\*</sup> and Baoshan Xing<sup>7,\*</sup>

<sup>1</sup> Institute of Environmental Processes and Pollution Control, and School of Environmental and Civil Engineering, Jiangnan University, Wuxi 214122, China

<sup>2</sup> Institute of Coastal Environmental Pollution Control, and Ministry of Education Key Laboratory of Marine Environment and Ecology, Ocean University of China, Qingdao 266100, China

<sup>3</sup> School of Environmental Science and Engineering, Qingdao University, Qingdao 266071, China

<sup>4</sup> State Key Laboratory of Geohazard Prevention and Geoenvironment Protection (Chengdu University of Technology), 1#, Dongsanlu, Erxianqiao, Chengdu 610059, Sichuan, China

<sup>5</sup> Northwest Institute of Eco-Environment and Resources, Chinese Academy of Sciences, Lanzhou 730000, China

<sup>6</sup> Laboratory for Marine Ecology and Environmental Science, Qingdao National Laboratory for Marine Science and Technology, Qingdao 266237, China

<sup>7</sup> Stockbridge School of Agriculture, University of Massachusetts, Amherst, MA 01003, United States

\*Corresponding authors:

Dr. Zhao: jzhao@ouc.edu.cn; Dr. Xing: bx@umass.edu

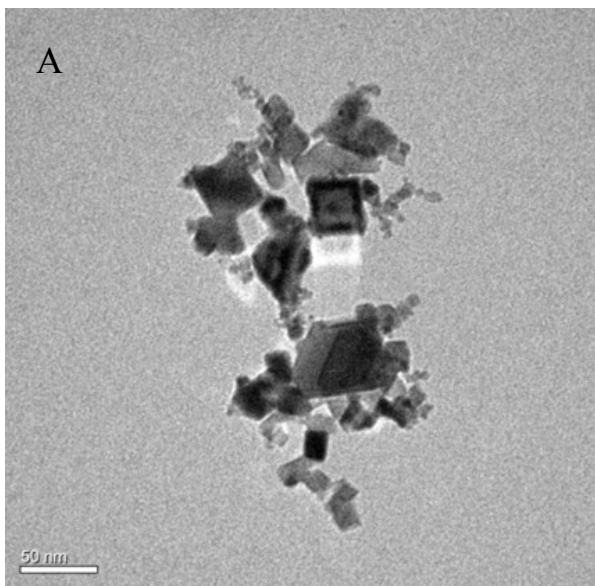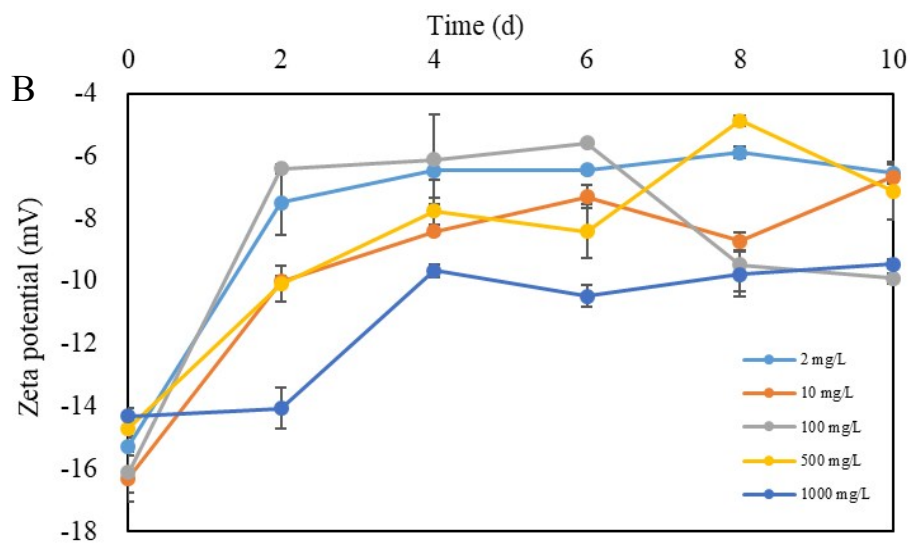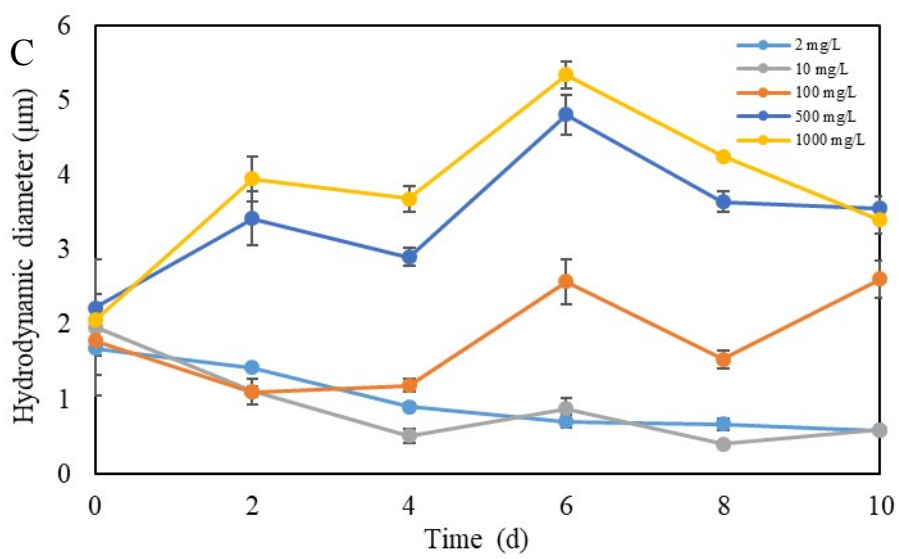

Figure S1. Characterization of CeO<sub>2</sub> NPs. (A): TEM image of pristine CeO<sub>2</sub> NPs. (B) and (C): The zeta potentials and hydrodynamic diameters of CeO<sub>2</sub> NPs (nominal concentrations: 2, 10, 100, 500, and 1000 mg/L) in the nutrient solution after incubation for 0, 2, 4, 6, 8 and 10 days, respectively. The Error bars along with the data denote the standard deviations (n = 3).

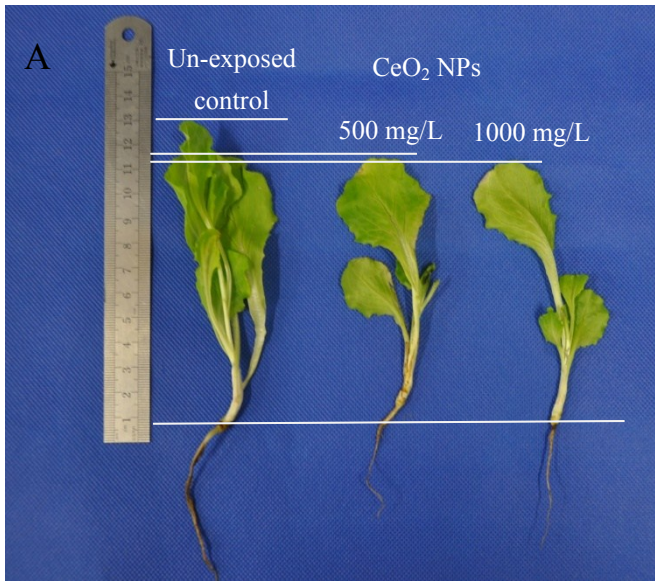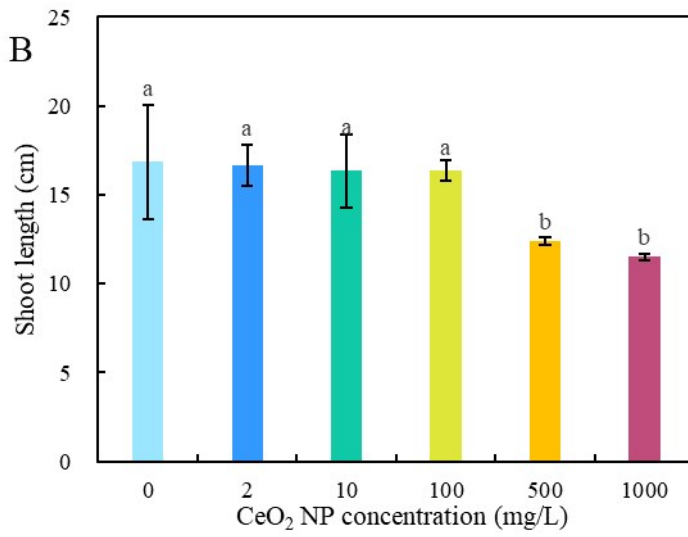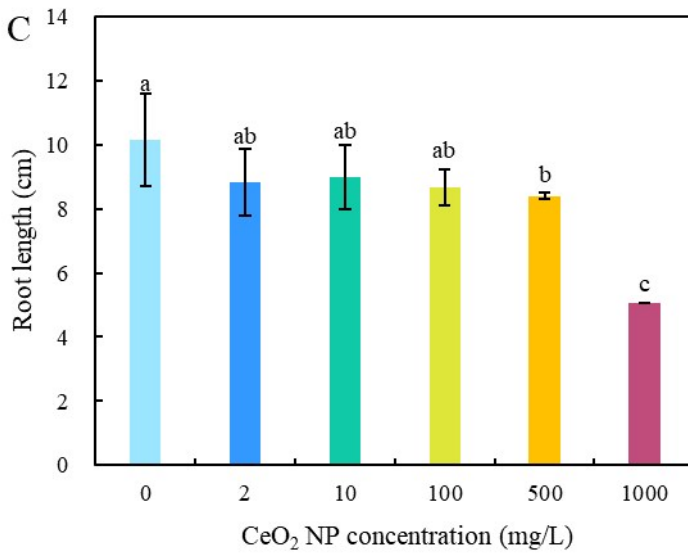

Figure S2. Growth of lettuce under CeO<sub>2</sub> NPs exposure (at nominal concentrations of 0-1000 mg/L,

10 days) via the roots. (A): The image of lettuce growth; (B), (C): Shoot and root length of lettuce, respectively. Different letters (a-c) denoted significant difference (n = 3).

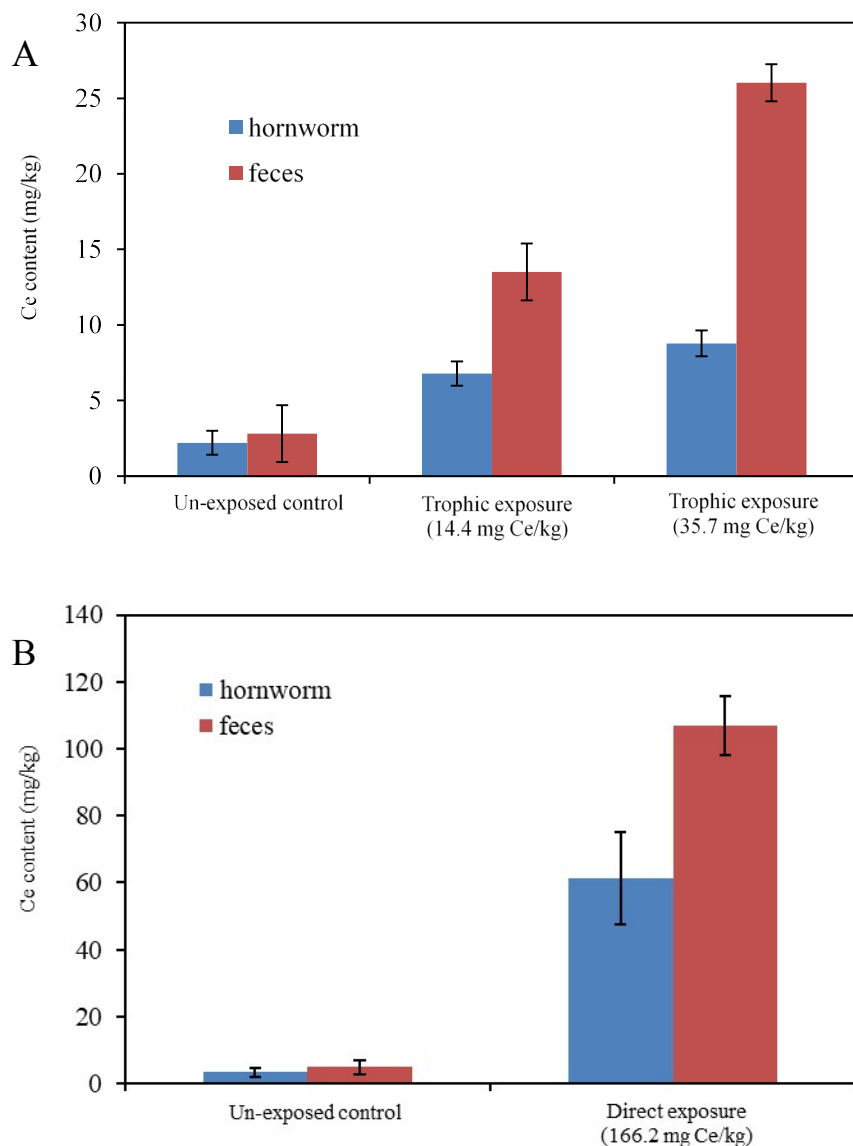

Figure S3. Ce contents in hornworms and feces under different exposures over 7 days. (A): Trophic exposure: hornworms were fed with leaves collected from lettuce under root exposure (14.4 and 35.7 mg Ce/kg dry leaves). (B): Direct exposure: hornworms were fed with leaves of lettuce under foliar exposure (166.2 mg Ce/kg dry leaves).

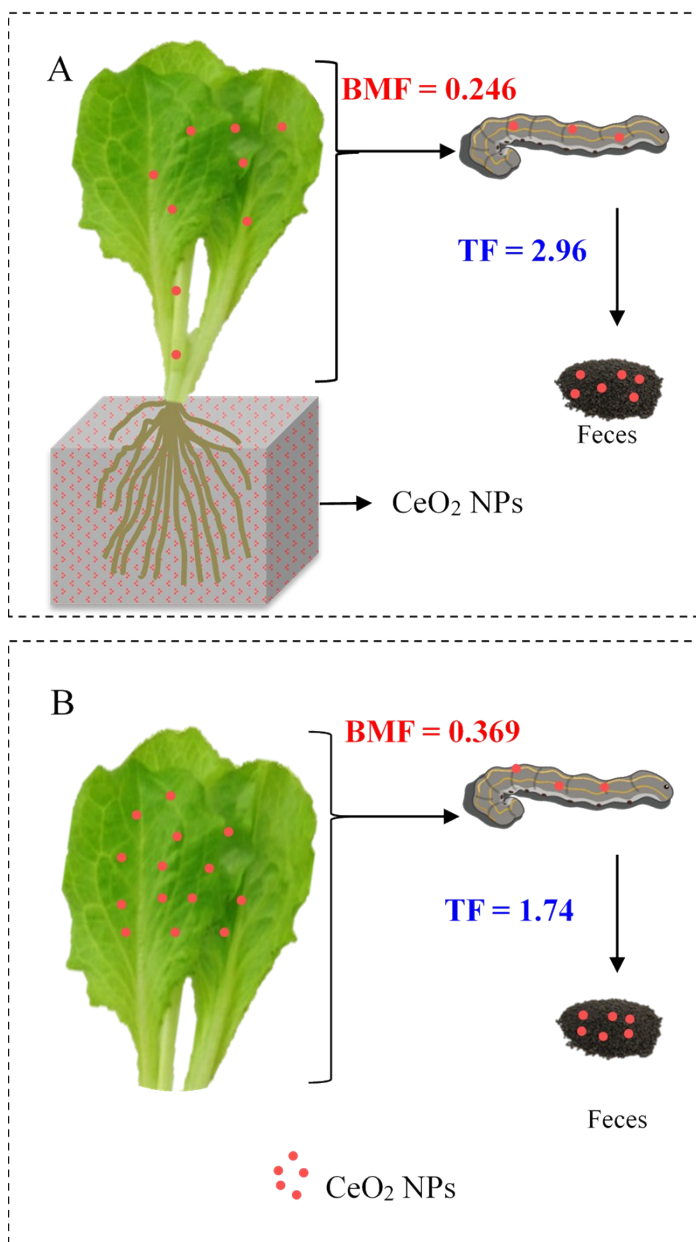

Figure S4. The diagram of hornworms upon trophic and direct exposures. (A): Trophic exposure: hornworms were fed with leaves of lettuce under root exposure (35.7 mg Ce/kg dry leaves). (B): Direct exposure: hornworms consumed leaves of lettuce under foliar exposure (166.2 mg Ce/kg dry leaves). BMF: biomagnification factor; TF: translocation factor.

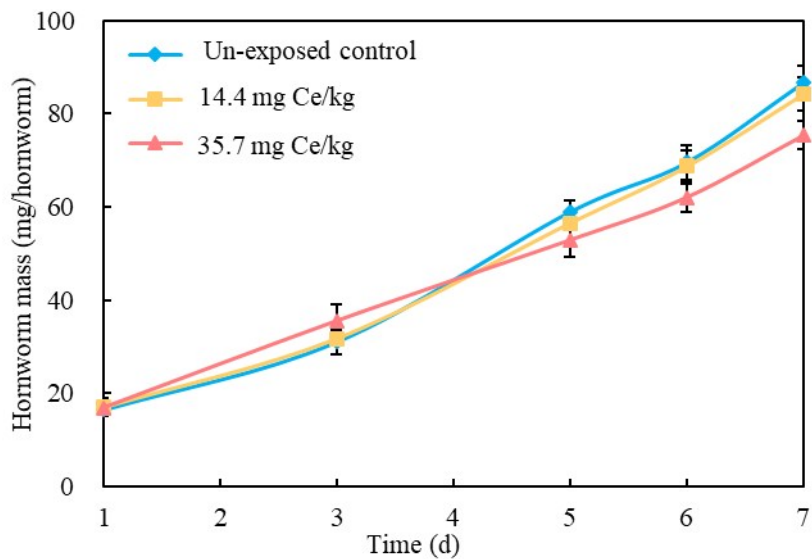

Figure S5. Mass of hornworms after trophic exposure as a function of exposure time. Trophic exposure meant hornworms were fed with leaves of lettuce upon root exposure, and the Ce contents in leaves were 14.4 and 35.7 mg Ce/kg (dry weight), respectively. Error bars indicate standard deviations (n = 5).

Table S1. Ce contents in main organs and feces of chicken under hornworm and leaf dietaries.

Hornworm dietary: chickens were fed with hornworms pre-fed with leaves of lettuce under root exposure (35.7 mg Ce/kg dry leaves). Leaf dietary: chickens were fed with leaves of lettuce under root exposure (35.7 mg Ce/kg dry leaves).

| Tissues   | Un-exposed control<br>(mg/kg, d.w.) | Hornworm dietary<br>(mg/kg, d.w.) | Leaf dietary<br>(mg/kg, d.w.) |
|-----------|-------------------------------------|-----------------------------------|-------------------------------|
| Intestine | 0.421±0.090 c                       | 5.28±1.11 b                       | 18.2±3.0 a                    |
| Stomach   | 0.145±0.005 c                       | 3.70±1.21 b                       | 6.96±0.50 a                   |
| Brain     | 0.421±0.184 a                       | 0.633±0.142 a                     | 0.284±0.145 a                 |
| Liver     | 0.0987±0.0373 a                     | 0.0594±0.0138 a                   | 0.0657±0.0010 a               |
| Spleen    | 0.304±0.158 a                       | 0.213±0.090 a                     | 0.123±0.033 a                 |
| Kidney    | 0.116±0.043 b                       | 0.302±0.061 a                     | 0.208±0.101 ab                |
| Heart     | 0.152±0.003 a                       | 0.134±0.024 a                     | 0.154±0.003 a                 |
| Muscle    | 0.108±0.010 c                       | 0.254±0.096 b                     | 0.478±0.115 a                 |
| Blood     | -                                   | -                                 | -                             |
| Feces     | 0.777±0.220 c                       | 13.23±1.51 a                      | 3.63±0.38 b                   |

“-” indicates that Ce content was under the detection limit. d.w.: dry weight.



Table S2. TFs of chicken main organs after hornworm and leaf dietaries. Hornworm dietary: chickens were fed with hornworms (8.78 mg Ce/kg dry hornworms) pre-fed with lettuce leaves (35.7 mg Ce/kg dry leaves) under root exposure; Leaf dietary: chickens were fed with lettuce leaves (35.7 mg Ce/kg dry leaves) after root exposure. TF: translocation factor.

| Tissues   | Un-exposed control       | Hornworm dietary             | Leaf dietary             |
|-----------|--------------------------|------------------------------|--------------------------|
|           | TF <sub>organ-leaf</sub> | TF <sub>organ-hornworm</sub> | TF <sub>organ-leaf</sub> |
| Intestine | 0.065                    | 0.601                        | 0.510                    |
| Stomach   | 0.023                    | 0.421                        | 0.195                    |
| Brain     | 0.065                    | 0.072                        | 0.008                    |
| Liver     | 0.015                    | 0.007                        | 0.002                    |
| Spleen    | 0.047                    | 0.024                        | 0.003                    |
| Kidney    | 0.018                    | 0.034                        | 0.006                    |
| Heart     | 0.024                    | 0.015                        | 0.004                    |
| Muscle    | 0.017                    | 0.029                        | 0.013                    |
